# Supplementary figures and images for: A New Neolignan Derivative, Balanophonin Isolated from Firmiana simplex Delays the Progress of Neuronal Cell Death by Inhibiting Microglial Activation
Source: PubMed Central journal article supplement — Biomol Ther (Seoul). 2017 May 30;25(5):519–27. doi: 10.4062/biomolther.2016.224 (PMC5590796; doi:10.4062/biomolther.2016.224), 2017-05-30

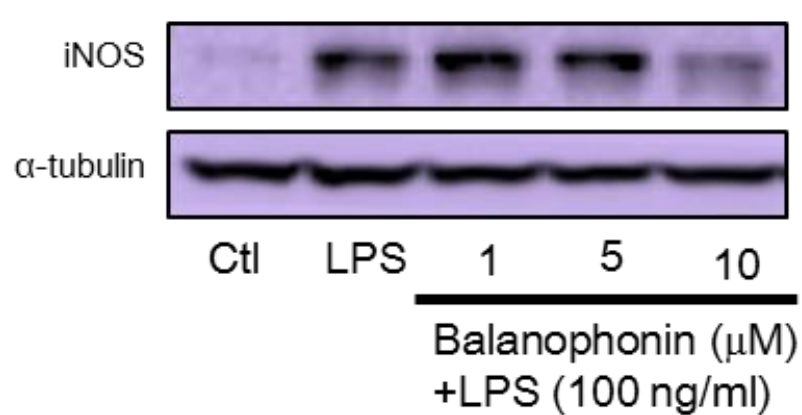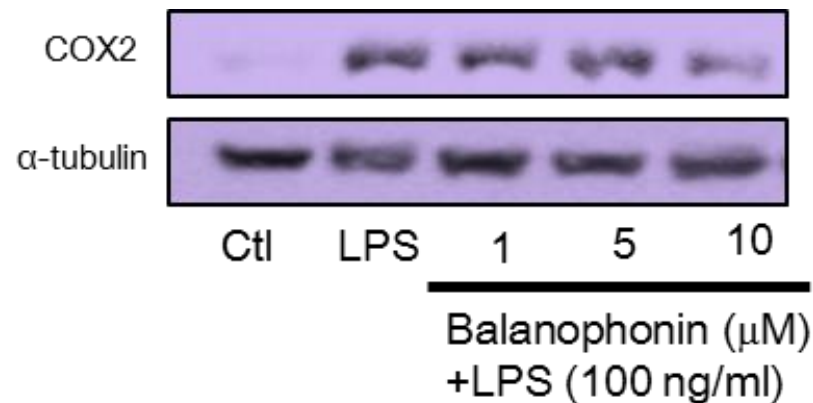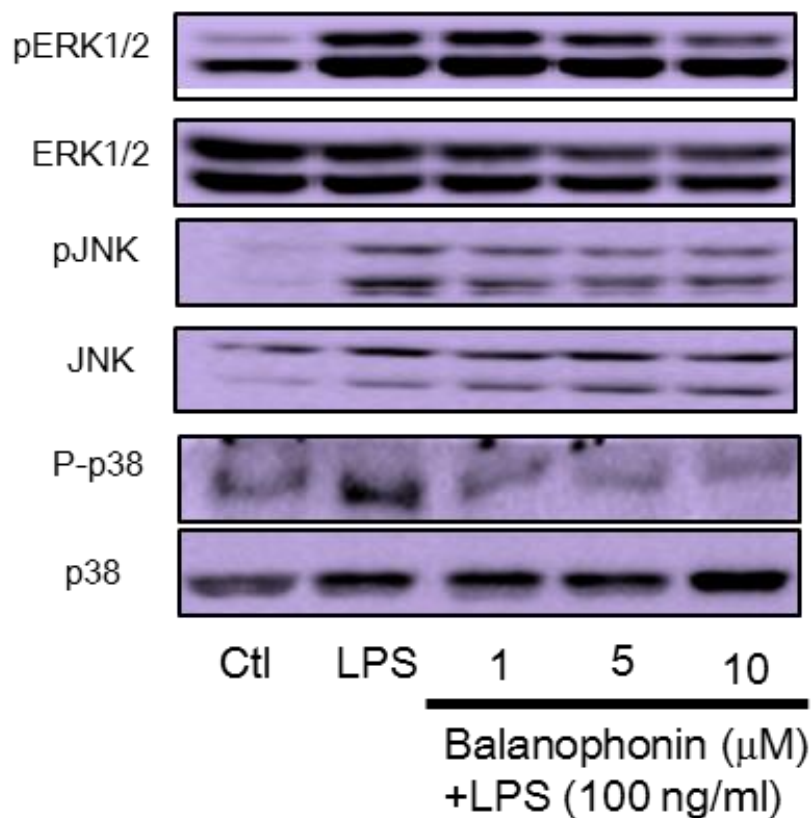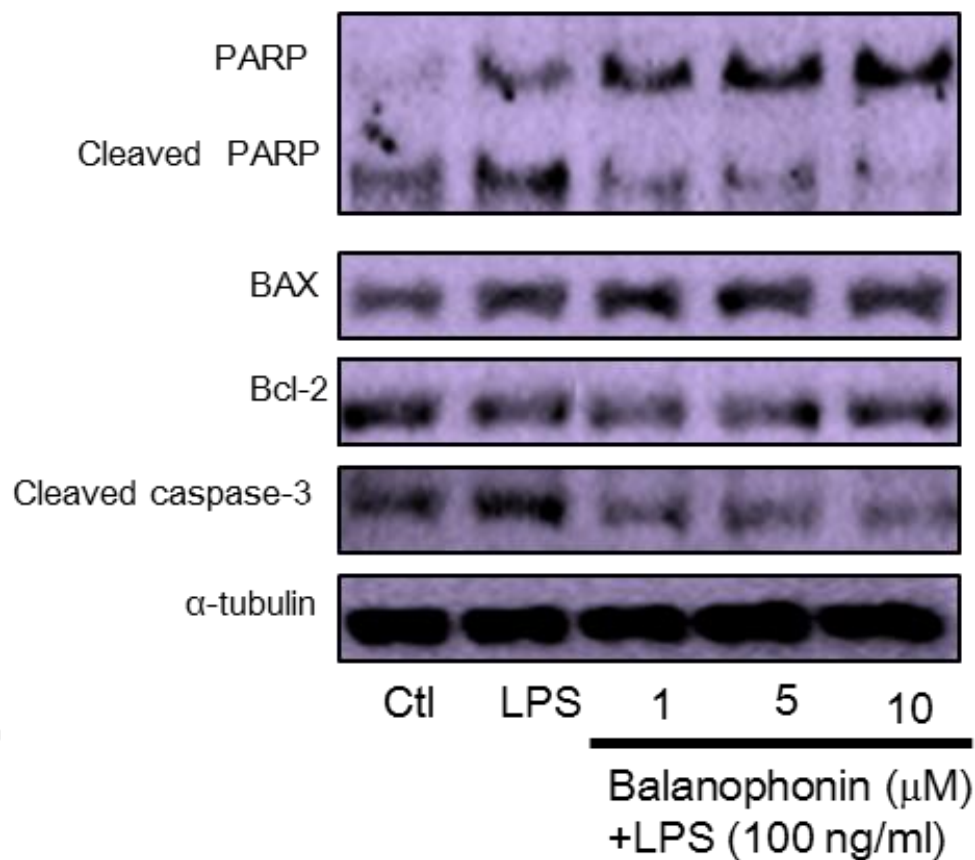

Supplementary Figure 1

Supplement: bt-25-519_suppl.pdf [file bt-25-519_suppl.pdf]
